# Supplementary material
Source: PubMed Central journal article supplement (PMC5967419)
Supplement: CJN.02530317SupplementaryData.pdf [file CJN.02530317SupplementaryData.pdf]

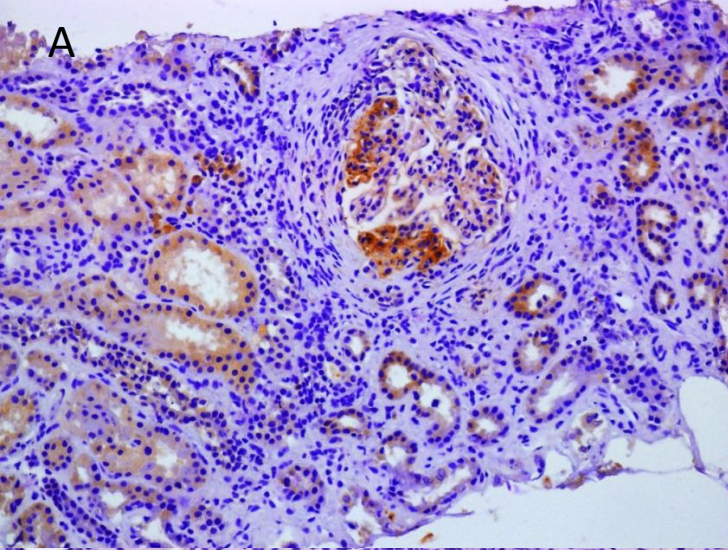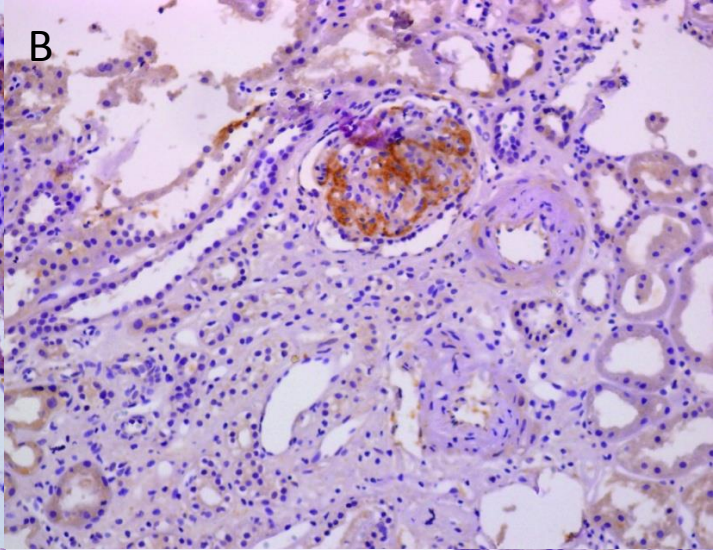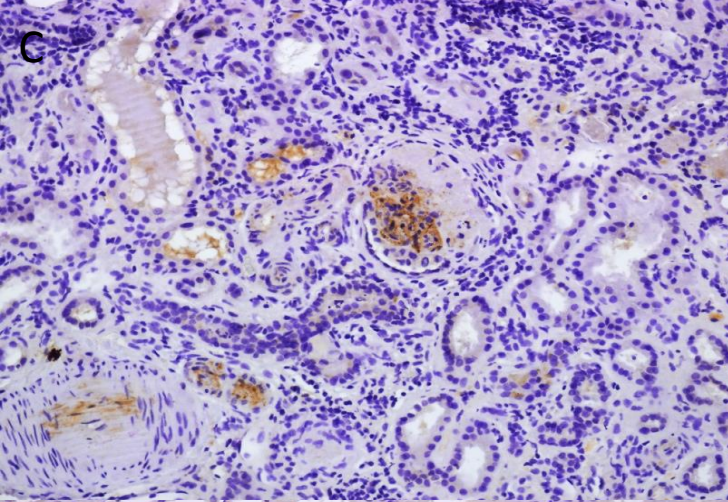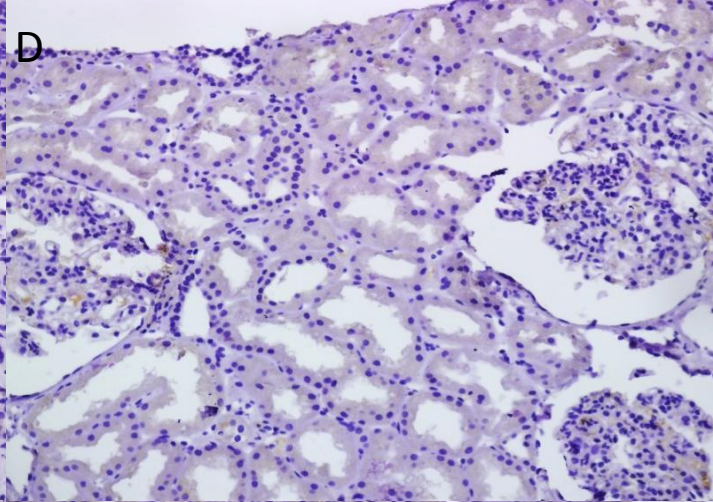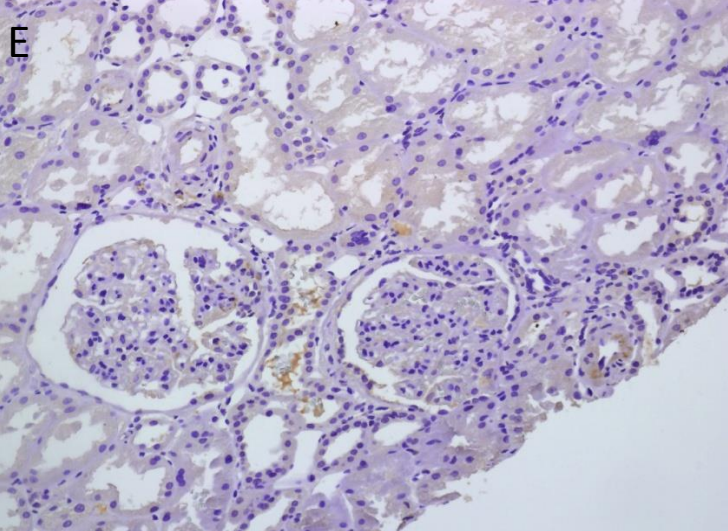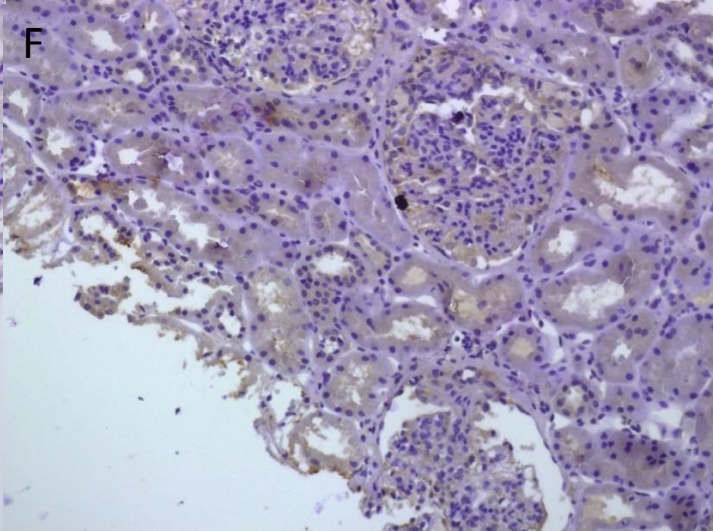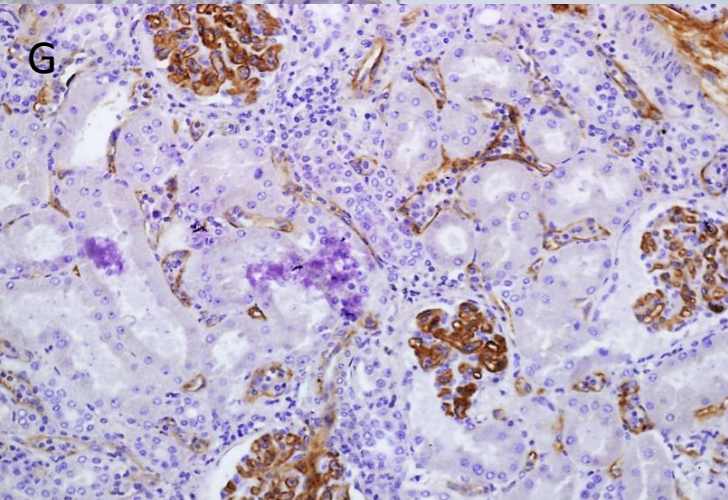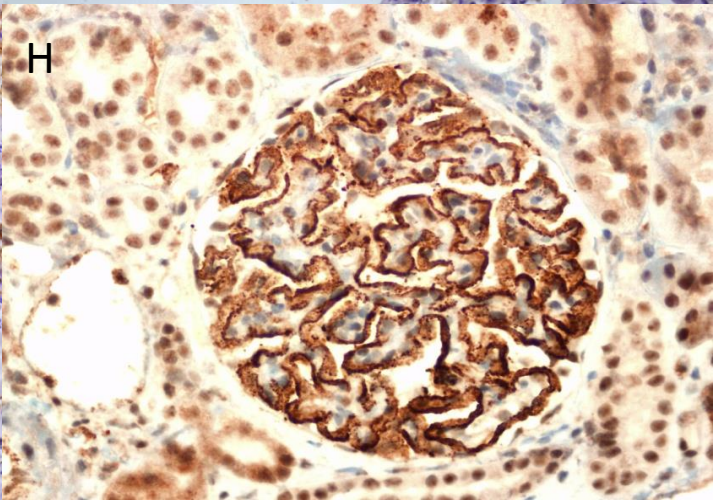

## Supplemental Figure 1

Representative images of IgA nephropathy biopsies with positive (A,B,C) and negative (D,E,F) mesangial C4d stainings, and positive control of patients with humoral rejection (E) and membranous nephropathy (F). Original magnification, x 100 in A - G, x 400 in H.
